# Supplementary material for: Development of Two Patient Self-Reported Measures on Functional Health Status (FOD) and Health-Related Quality of Life (QOD) in Adults with Oropharyngeal Dysphagia Using the Delphi Technique
Source: MDPI journal article supplement (doi:10.3390/jcm11195920), 2022-10-07
Supplement: s1 [file s1]

## Supplementary File S1.

### Development of two patient self-reported measures on functional health status (FOD) and health-related quality of life (QOD) in adults with oropharyngeal dysphagia using the Delphi technique

Renée Speyer <sup>1,2,3</sup>, Reinie Cordier <sup>2,4</sup>, Deborah Denman <sup>5</sup>, Catriona Windsor <sup>1</sup>, Gintas P. Krisciunas <sup>6</sup>, David Smithard <sup>7</sup> and Bas J. Heijnen <sup>3</sup>

<sup>1</sup> Department Special Needs Education, University of Oslo, 0318 Oslo, Norway

<sup>2</sup> Curtin School of Allied Health, Faculty of Health Sciences, Curtin University, Perth, WA 6102, Australia

<sup>3</sup> Department of Otorhinolaryngology and Head and Neck Surgery, Leiden University Medical Center, 1233 ZA Leiden, The Netherlands

<sup>4</sup> Department of Social Work, Education and Community Wellbeing, Faculty of Health & Life Sciences, Northumbria University, Newcastle upon the Tyne, NE7 7XA, United Kingdom

<sup>5</sup> Macquarie University, Department of Linguistics, Faculty of Medicine, Health, and Human Sciences, New South Wales 2109, Australia

<sup>6</sup> Boston University School of Medicine, Boston, MA 02118, United States

<sup>7</sup> Centre for Exercise and Active Rehabilitation, University of Greenwich SE9 2BP

### Participants demographics

| Participants demographics                                                        |                                                 | Delphi Round I<br>(N=78) |      | Delphi Round II<br>(N=66) |      |
|----------------------------------------------------------------------------------|-------------------------------------------------|--------------------------|------|---------------------------|------|
|                                                                                  |                                                 | <i>n</i>                 | %    | <i>n</i>                  | %    |
| <b>Continent of residence<br/>(Number of countries)</b>                          | Europe (18 countries)                           | 51                       | 65.4 | 49                        | 74.2 |
|                                                                                  | Asia (7 countries)                              | 7                        | 9.0  | 5                         | 7.6  |
|                                                                                  | North America (2 countries)                     | 4                        | 5.1  | 2                         | 3.0  |
|                                                                                  | South America (2 countries)                     | 7                        | 9.0  | 3                         | 4.5  |
|                                                                                  | Oceania (2 countries)                           | 9                        | 11.5 | 7                         | 10.6 |
| <b>Highest qualification<br/>(related to work in the<br/>field of dysphagia)</b> | Bachelor                                        | 12                       | 16.2 | 9                         | 13.6 |
|                                                                                  | Master                                          | 19                       | 25.7 | 24                        | 36.4 |
|                                                                                  | PhD                                             | 43                       | 58.1 | 33                        | 50.0 |
| <b>Profession</b>                                                                | Speech Language Pathologist                     | 46                       | 59.0 | 41                        | 62.1 |
|                                                                                  | Occupational Therapist                          | 6                        | 7.7  | 5                         | 7.6  |
|                                                                                  | Dietician                                       | 1                        | 1.3  | 1                         | 1.5  |
|                                                                                  | Medical Specialist                              | 19                       | 24.4 | 17                        | 25.8 |
|                                                                                  | Dual Allied Health / Med Specialist             | 6                        | 7.7  | 2                         | 3.0  |
| <b>Practice setting</b>                                                          | Hospital / Teaching hospital                    | 62                       | 79.5 | 47                        | 71.2 |
|                                                                                  | University / Education sector                   | 26                       | 33.3 | 22                        | 33.3 |
|                                                                                  | Private practice                                | 12                       | 15.4 | 10                        | 15.1 |
|                                                                                  | Community health centre                         | 7                        | 9.0  | 8                         | 12.1 |
|                                                                                  | Residential aged / Disability care              | 6                        | 7.7  | 2                         | 3    |
|                                                                                  | Student                                         | 5                        | 6.5  | 5                         | 7.6  |
| <b>Patient populations</b>                                                       | Degenerative neurological disorders             | 65                       | 83.3 | 52                        | 78.8 |
|                                                                                  | Non-degenerative / Acquired neurological trauma | 64                       | 82.1 | 54                        | 81.1 |
|                                                                                  | Geriatrics                                      | 34                       | 43.6 | 28                        | 42.4 |
|                                                                                  | Oncology                                        | 32                       | 41.0 | 34                        | 51.5 |
|                                                                                  | Respiratory diseases                            | 23                       | 29.5 | 18                        | 27.3 |
|                                                                                  | Gastroenterology                                | 17                       | 21.8 | 14                        | 21.2 |
| <b>Years of experience</b>                                                       | 5 - 10 yrs                                      | 17                       | 21.8 | 15                        | 22.7 |
|                                                                                  | 11 - 15 yrs                                     | 21                       | 26.9 | 20                        | 30.3 |
|                                                                                  | 16 - 20 yrs                                     | 14                       | 17.9 | 11                        | 16.7 |
|                                                                                  | 21 - 30 yrs                                     | 19                       | 24.4 | 14                        | 21.2 |
|                                                                                  | > 30 yrs                                        | 7                        | 9.0  | 6                         | 9.1  |

## **Supplementary file S2.**

### **Development of two patient self-reported measures on functional health status (FOD) and health-related quality of life (QOD) in adults with oropharyngeal dysphagia using the Delphi technique**

**Renée Speyer<sup>1,2,3</sup>, Reinie Cordier<sup>4,2</sup>, Deborah Denman<sup>5</sup>, Catriona Windsor<sup>1</sup>, Gintas P. Krisciunas<sup>6</sup>, David Smithard<sup>7</sup> and Bas J. Heijnen<sup>3</sup>**

<sup>1</sup> Department Special Needs Education, University of Oslo, 0318 Oslo, Norway

<sup>2</sup> Curtin School of Allied Health, Faculty of Health Sciences, Curtin University, Perth, WA 6102, Australia

<sup>3</sup> Department of Otorhinolaryngology and Head and Neck Surgery, Leiden University Medical Center, 1233 ZA Leiden, The Netherlands

<sup>4</sup> Department of Social Work, Education and Community Wellbeing, Faculty of Health & Life Sciences, Northumbria University, Newcastle upon the Tyne, NE7 7XA, United Kingdom

<sup>5</sup> Macquarie University, Department of Linguistics, Faculty of Medicine, Health, and Human Sciences, New South Wales 2109, Australia

<sup>6</sup> Boston University School of Medicine, Boston, MA 02118, United States

<sup>7</sup> Centre for Exercise and Active Rehabilitation, University of Greenwich SE9 2BP

### **Prototype measure ‘Functional health status measure of Oropharyngeal Dysphagia’ (FOD): *Example items***

I have difficulty swallowing thin liquids (e.g.: water, tea, coffee, juice, beer).

I avoid certain foods.

I take supplemental nourishment through a feeding tube.

I cannot maintain my weight.

It takes me a long time to eat.

I have difficulties chewing (these difficulties are not due to poor dentition).

There is food left in my mouth after I have swallowed.

Swallowing is more difficult when I am feeling tired.

### **Prototype measure ‘health-related Quality of life measure of Oropharyngeal Dysphagia’ (QOD): *Example items***

My swallowing difficulties make my life less enjoyable.

I feel anxious that I will choke when I eat.

I am embarrassed to eat or drink in the presence of other people.

Other people are irritated by my swallowing difficulties.

I feel excluded because of my swallowing difficulties.

My swallowing difficulties frustrate me.

Swallowing is stressful.

I feel emotionally worn out due to my swallowing difficulties.
